# Supplementary material for: Experience of COVID-19 disease and fear of the SARS-CoV-2 virus among Polish students
Source: PeerJ journal article supplement (doi:10.7717/peerj.14356), 2022-12-13
Supplement: Codebook_Fear__of_COVID-19.xlsx [file Codebook_Fear__of_COVID-19.xlsx]

## Sheet: Var.
Var.	Label
No.	No.
M1	M1. Age - select the appropriate period
M2	M2. Sex
M3	M3. Professional status
M4	M4. Type of university
M5	M5. Type of studies
M6	M6. Level of studies
M7.txt	M7.txt. Field of studies
M8.int	M8.int. Year of studies
P1	P1. Have you had COVID-19?
P1A	P1A. If yes, what is/was the disease like?
P2	P2. Has any of your relatives or friends been ill with COVID-19?
P2A	P2A. If yes, what is/was the disease like?
P3	P3. Place of permanent residence
Q.01	Q.01. I am most afraid of coronavirus-19
Q.02	Q.02. It makes me uncomfortable to think about coronavirus-19
Q.03	Q.03. My hands become clammy when I think about coronavirus-19
Q.04	Q.04. I am afraid of losing my life because of coronavirus-19
Q.05	Q.05. When watching news and stories about coronavirus-19 on social media, I become nervous or anxious.
Q.06	Q.06. I cannot sleep because I’m worrying about getting coronavirus-19
Q.07	Q.07. My heart races or palpitates when I think about getting coronavirus-19

## Sheet: Values
Var.		Lable
M2	1	woman
	2	man
M3	3	I study
	4	I study and work
M4	1	public
	2	not public
M5	1	full-time studies
M6	1	licentiate studies/engineering studies
	2	five-year studies
	3	second-cycle studies
P1	1	yes
	2	no
P1A	1	asymptomatic
	2	slightly
	3	badly
	4	very badly
P2	1	yes
	2	no
P2A	1	asymptomatic
	2	slightly
	3	badly
	4	very badly
	5	unfortunately deadly
P3	1	up to 20 thousand inhabitants
	2	20.001–50.000 inhabitants
	3	50.001–100.000 inhabitants
	4	above 100.000 inhabitants
Q.01	1	strongly disagree
	2	disagree
	3	neither agree nor disagree
	4	agree
	5	strongly agree
Q.02	1	strongly disagree
	2	disagree
	3	neither agree nor disagree
	4	agree
	5	strongly agree
Q.03	1	strongly disagree
	2	disagree
	3	neither agree nor disagree
	4	agree
	5	strongly agree
Q.04	1	strongly disagree
	2	disagree
	3	neither agree nor disagree
	4	agree
	5	strongly agree
Q.05	1	strongly disagree
	2	disagree
	3	neither agree nor disagree
	4	agree
	5	strongly agree
Q.06	1	strongly disagree
	2	disagree
	3	neither agree nor disagree
	4	agree
	5	strongly agree
Q.07	1	strongly disagree
	2	disagree
	3	neither agree nor disagree
	4	agree
	5	strongly agree
