# Supplementary material for: Experience of COVID-19 disease and fear of the SARS-CoV-2 virus among Polish students
Source: PeerJ journal article supplement (doi:10.7717/peerj.14356), 2022-12-13
Supplement: Database_Fear__of_COVID-19.xlsx [file Database_Fear__of_COVID-19.xlsx]

## Sheet: Fear of COVID-19
No.	Age	Sex	Job	Type of studies	Year of studies	COVID-19	How it was?	COVID-19 significant other	How it was for them?	Place of living	Q.01	Q.02	Q.03	Q.04	Q.05	Q.06	Q.07	Fear
91	18	1	3	1	1	2	#NULL!	2	#NULL!	1	1	1	1	5	1	1	1	1.57143
99	18	1	3	1	1	2	#NULL!	1	2	2	2	3	2	3	2	1	1	2
107	18	1	4	1	1	2	#NULL!	2	#NULL!	1	3	4	3	4	4	2	4	3.42857
220	18	1	3	1	1	2	#NULL!	2	#NULL!	2	3	2	1	1	3	1	1	1.71429
229	18	1	3	1	1	2	#NULL!	1	1	2	3	3	2	1	3	1	1	2
541	18	1	4	1	1	2	#NULL!	1	1	4	1	1	1	1	1	1	1	1
773	18	1	3	2	1	2	#NULL!	1	1	4	2	2	1	1	3	1	1	1.57143
896	18	1	4	1	1	2	#NULL!	2	#NULL!	4	1	1	1	1	1	1	1	1
316	18	2	4	1	1	2	#NULL!	2	#NULL!	4	4	3	1	4	3	1	1	2.42857
295	19	1	4	1	1	1	1	1	2	3	2	2	1	1	3	1	1	1.57143
771	19	1	3	2	1	1	1	1	2	4	3	4	2	1	4	1	2	2.42857
808	19	1	4	1	1	1	2	1	1	2	4	4	2	5	5	2	2	3.42857
1	19	1	3	1	1	2	#NULL!	2	#NULL!	4	1	1	1	1	2	1	1	1.14286
4	19	1	3	1	1	2	#NULL!	1	1	1	1	1	1	1	4	1	1	1.42857
31	19	1	3	2	1	2	#NULL!	1	1	4	3	5	2	1	3	1	2	2.42857
37	19	1	3	1	1	2	#NULL!	1	2	4	2	2	2	4	4	3	4	3
49	19	1	3	1	1	2	#NULL!	1	2	1	3	2	1	1	3	1	1	1.71429
89	19	1	3	1	1	2	#NULL!	1	2	3	3	2	1	2	3	1	2	2
182	19	1	3	1	1	2	#NULL!	1	1	4	2	1	1	2	2	1	1	1.42857
259	19	1	4	1	1	2	#NULL!	1	1	4	1	1	1	1	2	1	1	1.14286
264	19	1	3	1	1	2	#NULL!	2	#NULL!	1	1	1	1	1	1	1	1	1
288	19	1	3	1	1	2	#NULL!	1	1	3	1	2	1	2	2	1	1	1.42857
345	19	1	3	2	1	2	#NULL!	2	#NULL!	1	3	5	3	1	4	3	2	3
370	19	1	4	1	1	2	#NULL!	2	#NULL!	1	3	3	1	3	3	2	3	2.57143
400	19	1	4	1	3	2	#NULL!	2	#NULL!	4	4	4	2	3	4	1	3	3
415	19	1	3	1	2	2	#NULL!	1	2	4	1	1	1	1	1	1	1	1
421	19	1	3	1	1	2	#NULL!	1	1	1	1	1	1	1	2	1	1	1.14286
445	19	1	4	1	1	2	#NULL!	1	2	2	3	4	2	3	3	2	3	2.85714
459	19	1	4	2	1	2	#NULL!	2	#NULL!	1	4	4	1	1	3	1	1	2.14286
468	19	1	3	1	1	2	#NULL!	1	2	3	2	2	1	2	2	1	2	1.71429
495	19	1	3	1	1	2	#NULL!	2	#NULL!	4	1	1	1	1	1	1	1	1
508	19	1	3	1	1	2	#NULL!	2	#NULL!	4	3	4	1	1	4	1	1	2.14286
519	19	1	3	2	1	2	#NULL!	1	2	4	2	3	2	2	1	2	2	2
554	19	1	3	1	1	2	#NULL!	1	1	4	2	4	2	2	3	2	2	2.42857
595	19	1	4	1	1	2	#NULL!	1	2	1	3	2	2	3	3	2	2	2.42857
603	19	1	4	1	1	2	#NULL!	1	2	1	1	1	1	1	2	1	1	1.14286
611	19	1	3	1	1	2	#NULL!	1	1	2	2	2	2	2	2	2	2	2
622	19	1	3	1	1	2	#NULL!	1	2	1	2	1	1	1	1	1	1	1.14286
658	19	1	4	1	1	2	#NULL!	1	1	4	2	2	2	1	2	2	2	1.85714
686	19	1	3	1	1	2	#NULL!	2	#NULL!	4	1	2	1	1	4	1	1	1.57143
689	19	1	3	1	1	2	#NULL!	1	2	1	4	4	3	3	4	3	3	3.42857
690	19	1	3	2	1	2	#NULL!	1	1	1	2	2	2	3	5	1	1	2.28571
695	19	1	4	2	2	2	#NULL!	2	#NULL!	1	1	1	1	1	1	1	1	1
701	19	1	4	1	1	2	#NULL!	1	1	4	3	3	3	3	3	3	3	3
705	19	1	3	1	1	2	#NULL!	1	1	1	3	2	1	2	2	1	1	1.71429
708	19	1	4	1	1	2	#NULL!	1	1	1	2	1	2	1	2	1	1	1.42857
713	19	1	3	1	1	2	#NULL!	1	1	1	3	2	1	1	3	1	1	1.71429
714	19	1	3	1	1	2	#NULL!	2	#NULL!	3	3	4	4	2	3	1	1	2.57143
723	19	1	3	1	1	2	#NULL!	2	#NULL!	1	3	4	1	1	3	1	4	2.42857
758	19	1	4	1	1	2	#NULL!	1	2	4	4	3	2	3	4	2	2	2.85714
759	19	1	3	1	1	2	#NULL!	2	#NULL!	4	3	2	1	1	1	1	1	1.42857
776	19	1	4	1	1	2	#NULL!	2	#NULL!	4	2	4	2	1	1	2	2	2
802	19	1	4	1	1	2	#NULL!	2	#NULL!	4	1	3	1	1	2	1	1	1.42857
806	19	1	3	2	1	2	#NULL!	2	#NULL!	1	4	4	2	2	4	3	2	3
855	19	1	4	1	1	2	#NULL!	1	2	1	3	4	2	4	5	1	1	2.85714
884	19	1	4	2	1	2	#NULL!	1	2	1	1	2	1	1	1	1	1	1.14286
944	19	1	3	1	1	2	#NULL!	2	#NULL!	3	4	4	3	4	4	3	3	3.57143
949	19	1	4	1	1	2	#NULL!	1	1	4	1	1	1	1	1	1	1	1
960	19	1	4	1	1	2	#NULL!	1	1	3	2	2	2	2	3	1	1	1.85714
1000	19	1	4	1	1	2	#NULL!	1	1	4	3	4	1	1	3	1	1	2
556	19	2	4	1	1	1	1	1	2	1	1	4	1	1	2	1	1	1.57143
23	19	2	4	1	1	2	#NULL!	1	1	4	1	2	1	1	2	1	1	1.28571
52	19	2	3	1	1	2	#NULL!	1	2	4	3	4	2	3	4	1	1	2.57143
56	19	2	3	1	1	2	#NULL!	1	2	4	1	1	1	1	1	2	2	1.28571
68	19	2	3	2	1	2	#NULL!	1	2	1	2	2	3	3	3	3	3	2.71429
86	19	2	3	1	1	2	#NULL!	1	2	1	2	2	1	1	3	1	1	1.57143
131	19	2	4	2	1	2	#NULL!	2	#NULL!	2	1	2	1	4	1	1	1	1.57143
161	19	2	4	1	1	2	#NULL!	2	#NULL!	4	3	5	2	4	3	1	3	3
193	19	2	3	2	1	2	#NULL!	2	#NULL!	1	3	4	2	2	4	2	2	2.71429
417	19	2	4	2	1	2	#NULL!	1	2	4	4	4	2	2	5	1	1	2.71429
488	19	2	3	1	1	2	#NULL!	1	2	1	2	2	1	2	2	1	1	1.57143
498	19	2	4	1	1	2	#NULL!	2	#NULL!	4	1	1	1	1	1	1	1	1
533	19	2	4	1	1	2	#NULL!	2	#NULL!	1	3	3	1	3	4	1	1	2.28571
544	19	2	3	2	1	2	#NULL!	2	#NULL!	4	1	1	1	1	1	1	1	1
560	19	2	3	1	1	2	#NULL!	1	1	4	3	5	3	4	5	2	2	3.42857
576	19	2	3	1	1	2	#NULL!	2	#NULL!	1	3	3	2	1	2	1	1	1.85714
639	19	2	3	2	1	2	#NULL!	1	2	4	2	2	1	2	2	1	2	1.71429
716	19	2	4	1	1	2	#NULL!	2	#NULL!	1	2	1	1	2	1	1	1	1.28571
722	19	2	4	2	1	2	#NULL!	2	#NULL!	2	2	1	1	1	1	1	1	1.14286
753	19	2	4	1	1	2	#NULL!	2	#NULL!	1	1	4	1	1	4	1	1	1.85714
787	19	2	4	1	1	2	#NULL!	2	#NULL!	4	1	1	1	1	1	1	1	1
804	19	2	3	1	1	2	#NULL!	1	2	1	3	4	2	3	4	2	2	2.85714
854	19	2	3	1	1	2	#NULL!	1	2	1	1	1	1	1	1	1	1	1
906	19	2	3	1	1	2	#NULL!	2	#NULL!	2	1	1	1	1	1	1	1	1
913	19	2	4	1	1	2	#NULL!	1	2	2	2	1	1	1	5	1	1	1.71429
915	19	2	3	1	1	2	#NULL!	2	#NULL!	1	2	1	1	1	1	1	1	1.14286
916	19	2	3	1	1	2	#NULL!	2	#NULL!	2	1	1	1	1	1	1	1	1
930	19	2	3	1	1	2	#NULL!	1	1	2	1	1	1	1	1	1	1	1
942	19	2	3	1	1	2	#NULL!	1	2	1	2	2	2	2	2	2	2	2
948	19	2	3	1	1	2	#NULL!	1	1	1	3	3	2	3	3	2	2	2.57143
968	19	2	4	2	1	2	#NULL!	2	#NULL!	2	3	5	3	3	1	3	3	3
96	20	1	3	2	2	1	1	1	1	1	1	1	1	1	1	1	1	1
108	20	1	4	2	1	1	1	1	2	3	2	2	2	4	5	2	2	2.71429
129	20	1	4	1	2	1	2	1	1	1	4	5	2	4	4	2	3	3.42857
260	20	1	4	1	1	1	1	1	2	4	2	2	1	1	1	1	1	1.28571
380	20	1	3	1	2	1	1	1	2	3	2	2	2	1	3	1	1	1.71429
528	20	1	3	1	1	1	1	1	1	2	1	3	1	1	4	1	1	1.71429
567	20	1	3	1	1	1	1	1	1	1	2	3	1	2	2	2	2	2
663	20	1	3	1	1	1	1	1	2	1	2	2	1	2	4	2	2	2.14286
678	20	1	4	1	3	1	2	1	1	4	1	1	1	1	1	1	1	1
851	20	1	3	2	1	1	2	1	2	1	1	4	1	1	1	1	1	1.42857
879	20	1	3	1	1	1	1	1	1	4	1	2	1	1	1	1	1	1.14286
885	20	1	3	1	2	1	1	1	1	2	2	3	2	2	2	2	2	2.14286
18	20	1	3	1	2	2	#NULL!	1	2	2	2	4	1	2	3	1	4	2.42857
20	20	1	3	1	1	2	#NULL!	2	#NULL!	3	4	4	2	3	4	2	1	2.85714
29	20	1	3	1	1	2	#NULL!	1	2	2	4	4	3	5	3	3	5	3.85714
34	20	1	3	1	1	2	#NULL!	2	#NULL!	4	1	1	1	1	1	1	1	1
41	20	1	4	1	2	2	#NULL!	2	#NULL!	1	5	5	2	5	5	4	5	4.42857
62	20	1	3	1	1	2	#NULL!	1	1	4	1	1	1	1	1	1	1	1
69	20	1	4	1	1	2	#NULL!	1	1	1	3	2	1	1	1	1	1	1.42857
82	20	1	3	1	2	2	#NULL!	2	#NULL!	2	1	1	1	1	1	1	1	1
84	20	1	4	1	1	2	#NULL!	1	1	4	3	3	2	2	2	1	1	2
85	20	1	3	1	2	2	#NULL!	2	#NULL!	4	1	5	1	1	1	1	3	1.85714
101	20	1	3	1	2	2	#NULL!	1	2	3	1	3	2	2	2	2	2	2
105	20	1	4	1	1	2	#NULL!	1	2	3	5	3	1	4	5	1	3	3.14286
121	20	1	4	2	2	2	#NULL!	1	2	1	5	4	2	4	2	1	4	3.14286
123	20	1	4	1	2	2	#NULL!	1	1	1	2	4	1	1	2	1	1	1.71429
124	20	1	3	1	1	2	#NULL!	2	#NULL!	1	3	1	1	1	1	1	1	1.28571
132	20	1	4	2	2	2	#NULL!	1	1	4	3	4	3	2	2	3	3	2.85714
135	20	1	3	1	1	2	#NULL!	1	1	3	4	2	1	4	2	2	2	2.42857
143	20	1	3	1	1	2	#NULL!	1	1	1	1	3	1	1	1	1	1	1.28571
151	20	1	3	1	2	2	#NULL!	1	1	2	2	1	2	3	2	2	2	2
160	20	1	4	1	2	2	#NULL!	1	1	4	3	3	3	3	3	2	2	2.71429
183	20	1	4	1	1	2	#NULL!	1	1	4	4	4	2	2	3	3	3	3
186	20	1	3	1	1	2	#NULL!	2	#NULL!	2	1	2	2	2	3	1	1	1.71429
201	20	1	4	1	2	2	#NULL!	2	#NULL!	4	2	2	1	1	2	1	1	1.42857
206	20	1	4	2	1	2	#NULL!	1	2	4	2	3	1	1	1	1	1	1.42857
210	20	1	3	1	1	2	#NULL!	1	1	4	2	3	1	2	2	1	2	1.85714
227	20	1	3	2	1	2	#NULL!	2	#NULL!	1	2	3	1	2	2	1	2	1.85714
234	20	1	3	1	1	2	#NULL!	2	#NULL!	1	2	2	1	2	2	1	1	1.57143
275	20	1	4	1	2	2	#NULL!	2	#NULL!	4	1	1	1	1	1	1	1	1
277	20	1	3	1	2	2	#NULL!	2	#NULL!	1	1	1	1	1	5	1	1	1.57143
282	20	1	3	2	2	2	#NULL!	1	2	3	2	3	1	1	4	1	2	2
285	20	1	3	1	1	2	#NULL!	2	#NULL!	3	4	2	2	1	2	1	1	1.85714
293	20	1	4	2	2	2	#NULL!	1	1	2	2	2	1	1	1	1	1	1.28571
305	20	1	3	1	2	2	#NULL!	2	#NULL!	1	3	4	2	4	4	2	2	3
325	20	1	4	1	2	2	#NULL!	1	1	1	1	3	1	1	1	1	1	1.28571
328	20	1	4	1	2	2	#NULL!	1	2	3	2	1	1	1	3	1	1	1.42857
335	20	1	3	1	1	2	#NULL!	2	#NULL!	1	3	4	2	4	4	2	2	3
339	20	1	3	1	1	2	#NULL!	2	#NULL!	4	3	2	2	3	1	1	2	2
342	20	1	4	2	1	2	#NULL!	1	1	2	3	4	1	1	2	1	1	1.85714
351	20	1	3	1	2	2	#NULL!	1	1	2	1	1	1	1	1	1	1	1
364	20	1	4	1	1	2	#NULL!	2	#NULL!	3	4	4	2	2	4	1	1	2.57143
371	20	1	4	1	1	2	#NULL!	2	#NULL!	1	3	3	3	3	3	3	3	3
381	20	1	3	1	1	2	#NULL!	1	1	1	4	4	2	4	3	2	2	3
391	20	1	4	1	1	2	#NULL!	1	2	4	1	4	2	1	2	1	1	1.71429
393	20	1	3	1	1	2	#NULL!	1	2	3	1	1	1	1	1	1	1	1
396	20	1	4	1	2	2	#NULL!	2	#NULL!	4	4	3	2	1	4	1	1	2.28571
398	20	1	3	1	1	2	#NULL!	1	1	3	3	3	1	2	3	1	1	2
411	20	1	3	1	1	2	#NULL!	1	1	2	3	4	1	1	4	1	1	2.14286
425	20	1	4	1	1	2	#NULL!	2	#NULL!	3	1	2	1	1	1	1	1	1.14286
438	20	1	3	1	1	2	#NULL!	2	#NULL!	3	3	4	2	1	3	1	1	2.14286
440	20	1	4	1	1	2	#NULL!	1	2	3	1	1	1	1	1	1	1	1
452	20	1	3	1	1	2	#NULL!	2	#NULL!	3	3	2	1	1	2	1	1	1.57143
463	20	1	3	1	1	2	#NULL!	1	2	1	4	3	3	4	3	3	4	3.42857
464	20	1	3	1	2	2	#NULL!	1	1	4	1	1	1	1	1	1	1	1
486	20	1	3	2	2	2	#NULL!	2	#NULL!	1	3	3	1	2	3	1	1	2
489	20	1	3	1	2	2	#NULL!	2	#NULL!	1	4	4	2	4	4	1	1	2.85714
494	20	1	3	1	1	2	#NULL!	2	#NULL!	4	4	3	1	3	5	2	2	2.85714
502	20	1	4	2	1	2	#NULL!	1	1	4	3	4	2	1	4	1	1	2.28571
511	20	1	3	2	1	2	#NULL!	1	2	4	2	3	1	1	1	1	1	1.42857
516	20	1	3	1	1	2	#NULL!	1	1	1	2	1	1	1	1	1	1	1.14286
520	20	1	3	1	2	2	#NULL!	1	2	4	3	2	1	2	3	1	1	1.85714
523	20	1	3	1	1	2	#NULL!	2	#NULL!	1	4	5	1	2	5	1	1	2.71429
525	20	1	3	1	1	2	#NULL!	2	#NULL!	1	1	1	1	1	3	1	1	1.28571
529	20	1	4	1	1	2	#NULL!	2	#NULL!	3	2	2	2	3	4	2	2	2.42857
530	20	1	4	1	1	2	#NULL!	1	1	4	2	2	1	1	3	1	2	1.71429
537	20	1	3	1	1	2	#NULL!	1	1	3	2	2	1	1	1	1	1	1.28571
564	20	1	4	2	1	2	#NULL!	1	2	4	4	3	2	2	4	2	2	2.71429
569	20	1	3	1	2	2	#NULL!	1	2	1	2	2	2	1	4	1	1	1.85714
577	20	1	3	1	1	2	#NULL!	2	#NULL!	4	3	4	2	4	3	2	3	3
579	20	1	3	1	2	2	#NULL!	1	2	3	3	4	2	2	4	2	1	2.57143
585	20	1	3	1	2	2	#NULL!	2	#NULL!	4	3	2	1	2	2	1	1	1.71429
591	20	1	4	1	1	2	#NULL!	2	#NULL!	1	3	3	1	4	4	4	1	2.85714
612	20	1	3	1	1	2	#NULL!	2	#NULL!	4	3	1	1	2	3	1	1	1.71429
637	20	1	3	1	2	2	#NULL!	1	1	4	2	2	1	1	2	1	1	1.42857
677	20	1	3	1	1	2	#NULL!	1	2	4	4	4	5	3	1	5	1	3.28571
685	20	1	4	1	1	2	#NULL!	1	1	4	1	1	1	2	4	1	1	1.57143
707	20	1	3	1	1	2	#NULL!	2	#NULL!	1	2	3	1	3	5	2	1	2.42857
711	20	1	4	1	1	2	#NULL!	1	1	1	1	1	1	1	1	1	1	1
725	20	1	3	1	1	2	#NULL!	1	1	4	3	4	2	2	2	1	1	2.14286
730	20	1	3	1	2	2	#NULL!	1	1	4	3	2	1	1	3	1	1	1.71429
746	20	1	3	1	2	2	#NULL!	2	#NULL!	1	2	2	2	3	2	1	2	2
756	20	1	3	1	1	2	#NULL!	1	1	1	1	1	1	1	1	1	1	1
781	20	1	3	1	1	2	#NULL!	2	#NULL!	4	1	1	1	1	1	1	1	1
782	20	1	3	1	1	2	#NULL!	1	2	4	3	4	2	1	1	1	1	1.85714
797	20	1	4	2	1	2	#NULL!	1	2	2	3	2	1	3	1	1	1	1.71429
799	20	1	4	2	1	2	#NULL!	2	#NULL!	2	1	4	1	1	1	1	1	1.42857
815	20	1	4	1	1	2	#NULL!	1	2	1	3	4	1	1	4	1	1	2.14286
822	20	1	4	1	2	2	#NULL!	2	#NULL!	4	2	3	1	3	2	1	2	2
825	20	1	3	1	1	2	#NULL!	1	2	1	2	2	2	1	1	1	2	1.57143
841	20	1	4	1	2	2	#NULL!	1	1	4	4	3	1	4	3	1	1	2.42857
846	20	1	3	1	1	2	#NULL!	2	#NULL!	2	1	1	1	2	4	1	1	1.57143
848	20	1	3	1	1	2	#NULL!	1	1	1	2	2	1	1	2	2	1	1.57143
853	20	1	4	1	2	2	#NULL!	2	#NULL!	1	4	5	2	4	4	1	2	3.14286
874	20	1	4	1	1	2	#NULL!	1	1	4	2	2	2	4	2	2	2	2.28571
887	20	1	3	1	2	2	#NULL!	1	1	4	2	1	1	1	1	1	1	1.14286
935	20	1	4	1	1	2	#NULL!	1	1	2	4	2	4	3	5	3	3	3.42857
938	20	1	3	1	1	2	#NULL!	2	#NULL!	1	3	4	1	3	4	2	1	2.57143
966	20	1	3	1	2	2	#NULL!	2	#NULL!	1	2	2	1	2	2	1	2	1.71429
999	20	1	3	1	1	2	#NULL!	2	#NULL!	1	3	3	2	2	4	1	1	2.28571
81	20	2	4	1	1	1	1	1	2	1	4	3	1	3	4	2	2	2.71429
363	20	2	3	1	2	1	1	1	2	2	1	1	1	1	1	1	1	1
410	20	2	3	1	1	1	1	1	1	1	4	2	1	1	4	1	1	2
451	20	2	4	1	2	1	1	1	1	2	4	4	2	2	2	3	3	2.85714
712	20	2	3	1	1	1	1	1	1	3	2	2	2	2	2	1	2	1.85714
736	20	2	4	1	1	1	1	1	1	4	2	1	1	1	4	1	1	1.57143
878	20	2	4	2	1	1	1	1	1	4	2	2	2	2	2	2	2	2
903	20	2	4	1	2	1	1	1	1	1	2	2	2	2	2	2	2	2
27	20	2	3	1	1	2	#NULL!	2	#NULL!	4	2	4	1	2	2	1	1	1.85714
35	20	2	4	2	1	2	#NULL!	2	#NULL!	3	2	2	2	3	3	3	2	2.42857
102	20	2	4	1	1	2	#NULL!	1	1	1	2	1	1	1	1	1	1	1.14286
111	20	2	4	1	1	2	#NULL!	1	1	2	1	1	1	1	1	1	1	1
117	20	2	4	1	2	2	#NULL!	2	#NULL!	4	1	2	1	1	1	1	1	1.14286
157	20	2	3	1	2	2	#NULL!	2	#NULL!	1	1	1	1	1	1	1	1	1
170	20	2	4	1	2	2	#NULL!	1	1	4	3	3	3	3	3	3	3	3
171	20	2	3	1	1	2	#NULL!	2	#NULL!	4	1	2	1	1	1	1	1	1.14286
174	20	2	3	1	1	2	#NULL!	1	2	4	1	1	1	1	1	1	1	1
188	20	2	3	1	1	2	#NULL!	2	#NULL!	4	1	1	1	1	1	1	1	1
197	20	2	3	1	1	2	#NULL!	1	2	1	2	4	1	1	2	1	1	1.71429
205	20	2	4	1	1	2	#NULL!	1	1	1	1	1	1	1	1	1	1	1
207	20	2	4	1	1	2	#NULL!	1	1	4	1	1	1	1	1	1	1	1
217	20	2	4	2	1	2	#NULL!	2	#NULL!	3	3	2	1	2	3	1	4	2.28571
226	20	2	3	1	1	2	#NULL!	2	#NULL!	1	3	4	1	2	3	1	2	2.28571
245	20	2	4	1	2	2	#NULL!	2	#NULL!	4	2	2	1	1	1	1	1	1.28571
266	20	2	4	1	2	2	#NULL!	2	#NULL!	1	3	3	1	2	3	1	2	2.14286
268	20	2	3	1	1	2	#NULL!	2	#NULL!	4	4	3	4	2	5	2	2	3.14286
272	20	2	4	2	1	2	#NULL!	1	2	2	2	2	1	3	3	1	2	2
278	20	2	3	1	1	2	#NULL!	1	2	1	2	2	2	1	2	2	2	1.85714
283	20	2	3	1	1	2	#NULL!	2	#NULL!	1	2	2	1	2	2	1	2	1.71429
289	20	2	4	1	2	2	#NULL!	2	#NULL!	1	3	2	2	4	2	2	2	2.42857
292	20	2	3	1	2	2	#NULL!	1	2	1	3	2	2	1	2	1	2	1.85714
302	20	2	4	2	1	2	#NULL!	2	#NULL!	2	2	2	2	2	2	2	2	2
318	20	2	3	1	2	2	#NULL!	1	1	2	2	4	2	2	4	1	1	2.28571
348	20	2	3	1	1	2	#NULL!	2	#NULL!	1	4	4	2	2	4	1	1	2.57143
378	20	2	4	2	4	2	#NULL!	2	#NULL!	2	1	1	1	1	1	1	1	1
379	20	2	4	1	1	2	#NULL!	1	1	4	2	2	1	1	2	1	1	1.42857
392	20	2	4	1	2	2	#NULL!	2	#NULL!	3	2	1	1	1	1	2	3	1.57143
412	20	2	3	2	1	2	#NULL!	1	1	2	1	1	1	1	1	1	1	1
413	20	2	3	1	1	2	#NULL!	1	1	2	1	1	1	1	1	1	1	1
416	20	2	3	2	2	2	#NULL!	1	1	1	3	4	1	2	4	1	3	2.57143
441	20	2	3	1	1	2	#NULL!	1	1	1	1	1	1	1	1	1	1	1
447	20	2	3	1	2	2	#NULL!	1	1	4	2	4	2	3	4	1	1	2.42857
460	20	2	3	1	1	2	#NULL!	2	#NULL!	4	1	1	1	1	1	1	1	1
461	20	2	3	1	2	2	#NULL!	2	#NULL!	3	1	1	1	1	1	1	1	1
466	20	2	4	2	2	2	#NULL!	2	#NULL!	4	2	4	1	1	1	1	1	1.57143
505	20	2	4	1	1	2	#NULL!	2	#NULL!	1	2	2	1	1	1	1	1	1.28571
512	20	2	3	1	2	2	#NULL!	2	#NULL!	3	1	1	1	1	1	1	1	1
513	20	2	3	2	1	2	#NULL!	1	2	1	2	4	2	2	4	1	1	2.28571
517	20	2	4	1	1	2	#NULL!	2	#NULL!	1	2	2	2	2	2	2	2	2
538	20	2	3	2	1	2	#NULL!	2	#NULL!	2	3	2	1	5	3	2	2	2.57143
547	20	2	3	1	1	2	#NULL!	2	#NULL!	1	3	4	2	2	4	3	2	2.85714
551	20	2	3	1	1	2	#NULL!	2	#NULL!	4	1	1	1	1	1	1	1	1
570	20	2	4	1	3	2	#NULL!	1	2	4	2	2	2	2	1	1	1	1.57143
613	20	2	3	1	2	2	#NULL!	2	#NULL!	4	3	3	3	2	2	2	1	2.28571
644	20	2	4	1	1	2	#NULL!	1	2	3	3	3	2	2	4	1	1	2.28571
652	20	2	4	1	1	2	#NULL!	1	1	4	1	1	1	1	1	1	1	1
676	20	2	4	1	2	2	#NULL!	2	#NULL!	3	1	1	1	1	1	1	1	1
694	20	2	3	1	1	2	#NULL!	1	1	3	1	1	1	1	1	1	1	1
697	20	2	3	2	2	2	#NULL!	1	1	2	1	3	1	1	4	1	1	1.71429
718	20	2	4	1	1	2	#NULL!	2	#NULL!	2	1	1	1	1	1	1	1	1
738	20	2	3	1	2	2	#NULL!	1	1	1	4	3	4	3	4	4	4	3.71429
751	20	2	3	1	2	2	#NULL!	2	#NULL!	4	1	1	1	1	1	1	1	1
784	20	2	3	2	1	2	#NULL!	1	2	4	4	5	1	1	5	1	1	2.57143
792	20	2	4	1	2	2	#NULL!	1	1	3	2	3	1	1	1	1	1	1.42857
793	20	2	3	1	2	2	#NULL!	2	#NULL!	1	2	1	1	1	1	1	1	1.14286
794	20	2	4	1	1	2	#NULL!	1	1	4	1	2	1	1	2	1	1	1.28571
823	20	2	3	2	2	2	#NULL!	1	1	1	1	1	1	1	2	1	1	1.14286
871	20	2	3	1	1	2	#NULL!	2	#NULL!	3	2	2	1	1	1	1	1	1.28571
889	20	2	3	1	1	2	#NULL!	1	2	4	2	4	1	1	4	3	2	2.42857
892	20	2	4	1	1	2	#NULL!	2	#NULL!	1	3	1	1	4	2	1	1	1.85714
901	20	2	3	1	2	2	#NULL!	1	1	1	3	3	2	3	2	2	3	2.57143
904	20	2	4	1	2	2	#NULL!	2	#NULL!	4	3	2	1	2	2	1	1	1.71429
905	20	2	3	1	2	2	#NULL!	2	#NULL!	1	2	2	1	1	2	1	1	1.42857
912	20	2	3	1	1	2	#NULL!	2	#NULL!	1	1	3	1	1	1	1	1	1.28571
922	20	2	3	1	1	2	#NULL!	1	1	1	2	2	2	2	2	1	1	1.71429
929	20	2	3	2	1	2	#NULL!	2	#NULL!	4	1	1	1	1	1	1	1	1
940	20	2	3	1	1	2	#NULL!	2	#NULL!	4	2	4	2	1	3	1	1	2
953	20	2	4	2	1	2	#NULL!	1	1	3	2	4	1	2	3	1	2	2.14286
972	20	2	4	1	1	2	#NULL!	1	1	4	2	2	1	2	2	1	1	1.57143
977	20	2	4	1	1	2	#NULL!	1	2	2	2	2	1	1	2	1	1	1.42857
978	20	2	3	1	1	2	#NULL!	2	#NULL!	1	1	5	1	1	4	1	1	2
988	20	2	4	2	2	2	#NULL!	1	2	4	4	3	1	3	2	1	1	2.14286
990	20	2	4	2	1	2	#NULL!	1	1	2	2	1	1	1	1	1	1	1.14286
991	20	2	4	1	1	2	#NULL!	2	#NULL!	4	3	3	4	4	4	4	4	3.71429
100	21	1	4	1	2	1	2	1	2	4	4	4	1	4	4	1	1	2.71429
104	21	1	3	2	3	1	1	1	1	1	1	2	1	3	1	1	1	1.42857
120	21	1	3	1	3	1	1	1	1	3	3	3	2	2	2	1	1	2
153	21	1	3	1	3	1	1	1	2	1	3	4	2	3	4	2	2	2.85714
172	21	1	3	1	2	1	1	1	1	3	2	3	1	2	4	2	3	2.42857
221	21	1	3	1	3	1	1	1	2	4	2	1	1	1	1	1	1	1.14286
253	21	1	4	1	3	1	1	1	2	1	3	4	2	2	2	1	2	2.28571
284	21	1	3	1	1	1	1	1	1	4	1	2	1	1	1	1	1	1.14286
314	21	1	4	2	2	1	1	1	1	4	3	4	1	3	3	1	1	2.28571
480	21	1	3	1	2	1	1	1	1	4	3	5	4	4	3	4	3	3.71429
565	21	1	3	1	3	1	1	1	1	4	2	2	1	1	3	1	1	1.57143
584	21	1	3	2	2	1	1	1	2	4	1	1	1	4	4	1	1	1.85714
621	21	1	4	1	2	1	2	1	2	3	4	5	4	3	4	2	2	3.42857
688	21	1	4	1	2	1	2	1	2	2	2	2	1	1	3	1	1	1.57143
767	21	1	4	1	2	1	1	1	2	4	1	1	1	3	1	1	1	1.28571
798	21	1	4	1	1	1	1	1	2	2	1	2	1	2	1	1	1	1.28571
873	21	1	4	1	2	1	1	1	2	3	2	4	2	2	4	2	2	2.57143
992	21	1	4	1	3	1	1	1	2	4	2	2	1	1	1	1	1	1.28571
8	21	1	3	1	1	2	#NULL!	2	#NULL!	1	1	1	1	1	1	1	1	1
14	21	1	4	1	3	2	#NULL!	2	#NULL!	1	2	2	1	2	1	1	1	1.42857
21	21	1	3	2	2	2	#NULL!	1	2	4	4	4	1	3	3	1	1	2.42857
24	21	1	3	1	2	2	#NULL!	1	2	4	2	4	1	1	4	1	1	2
33	21	1	3	1	3	2	#NULL!	2	#NULL!	1	3	2	1	1	1	1	1	1.42857
38	21	1	3	2	2	2	#NULL!	1	1	2	1	1	1	1	1	1	1	1
47	21	1	3	1	3	2	#NULL!	2	#NULL!	1	2	2	1	2	2	1	1	1.57143
57	21	1	3	1	3	2	#NULL!	2	#NULL!	4	1	1	1	1	1	1	1	1
71	21	1	3	1	1	2	#NULL!	1	2	1	3	2	1	3	3	1	2	2.14286
73	21	1	4	1	2	2	#NULL!	1	2	4	2	2	2	2	4	2	2	2.28571
74	21	1	3	1	3	2	#NULL!	2	#NULL!	1	2	2	1	1	2	1	1	1.42857
76	21	1	4	1	3	2	#NULL!	1	1	3	2	2	1	1	1	1	2	1.42857
93	21	1	4	1	2	2	#NULL!	1	1	1	2	4	1	1	2	2	1	1.85714
98	21	1	4	2	1	2	#NULL!	2	#NULL!	1	3	2	1	3	1	1	1	1.71429
112	21	1	4	1	3	2	#NULL!	2	#NULL!	1	4	5	3	2	3	1	1	2.71429
116	21	1	3	1	1	2	#NULL!	2	#NULL!	3	2	1	1	1	1	1	1	1.14286
146	21	1	3	1	3	2	#NULL!	2	#NULL!	4	2	2	2	2	2	2	2	2
147	21	1	4	1	2	2	#NULL!	1	2	3	2	4	2	2	3	1	1	2.14286
175	21	1	4	1	3	2	#NULL!	1	1	1	2	2	2	2	2	2	2	2
185	21	1	3	2	2	2	#NULL!	2	#NULL!	1	3	2	2	4	2	1	1	2.14286
189	21	1	3	1	2	2	#NULL!	2	#NULL!	2	4	4	2	4	4	1	1	2.85714
191	21	1	3	1	2	2	#NULL!	2	#NULL!	2	4	4	4	5	4	5	3	4.14286
195	21	1	3	2	2	2	#NULL!	1	1	2	5	4	1	5	5	1	3	3.42857
211	21	1	4	1	3	2	#NULL!	2	#NULL!	4	1	2	1	2	2	1	1	1.42857
233	21	1	4	1	2	2	#NULL!	1	2	4	2	2	1	1	2	1	1	1.42857
269	21	1	3	1	2	2	#NULL!	1	1	2	1	4	1	1	4	1	1	1.85714
274	21	1	3	1	1	2	#NULL!	2	#NULL!	4	2	3	1	3	2	1	1	1.85714
296	21	1	3	1	2	2	#NULL!	1	1	4	3	4	1	1	4	1	1	2.14286
311	21	1	3	2	2	2	#NULL!	1	1	1	2	2	2	2	2	2	2	2
321	21	1	4	1	3	2	#NULL!	1	1	4	3	4	1	2	2	1	1	2
327	21	1	4	1	2	2	#NULL!	1	2	4	3	4	2	2	4	2	2	2.71429
331	21	1	4	1	3	2	#NULL!	1	2	4	1	1	1	1	1	1	1	1
333	21	1	3	1	2	2	#NULL!	2	#NULL!	1	4	4	2	4	4	2	2	3.14286
336	21	1	3	2	2	2	#NULL!	2	#NULL!	2	4	3	3	4	4	1	3	3.14286
337	21	1	4	1	1	2	#NULL!	1	2	4	3	3	1	4	3	1	3	2.57143
341	21	1	3	2	2	2	#NULL!	1	1	4	2	1	1	1	1	1	1	1.14286
343	21	1	3	1	1	2	#NULL!	1	2	1	3	4	2	2	2	1	4	2.57143
346	21	1	4	1	2	2	#NULL!	2	#NULL!	2	4	4	2	1	4	2	2	2.71429
347	21	1	4	1	1	2	#NULL!	1	1	4	2	2	2	1	1	1	1	1.42857
352	21	1	4	1	1	2	#NULL!	2	#NULL!	1	3	4	2	2	3	1	1	2.28571
358	21	1	3	1	3	2	#NULL!	1	2	1	3	2	1	4	1	1	2	2
365	21	1	3	1	2	2	#NULL!	1	2	1	2	2	2	1	2	2	2	1.85714
366	21	1	3	2	2	2	#NULL!	1	1	3	5	5	2	4	3	2	2	3.28571
369	21	1	3	2	3	2	#NULL!	1	1	4	1	1	1	1	1	1	1	1
382	21	1	4	1	1	2	#NULL!	2	#NULL!	2	2	2	2	3	4	2	2	2.42857
387	21	1	3	1	2	2	#NULL!	2	#NULL!	4	1	1	1	1	2	1	1	1.14286
390	21	1	3	1	2	2	#NULL!	1	1	4	3	3	2	5	3	1	1	2.57143
403	21	1	3	1	3	2	#NULL!	1	2	4	2	3	1	1	4	1	3	2.14286
414	21	1	4	1	2	2	#NULL!	2	#NULL!	4	2	1	1	1	1	1	1	1.14286
422	21	1	3	2	1	2	#NULL!	1	1	2	1	1	1	2	1	1	1	1.14286
430	21	1	4	1	3	2	#NULL!	1	1	4	3	2	1	3	2	1	1	1.85714
436	21	1	4	2	3	2	#NULL!	1	1	4	4	2	1	3	4	1	1	2.28571
467	21	1	4	1	2	2	#NULL!	2	#NULL!	3	3	2	1	1	3	1	1	1.71429
471	21	1	3	1	2	2	#NULL!	1	2	1	3	1	1	3	3	1	1	1.85714
475	21	1	3	1	3	2	#NULL!	2	#NULL!	4	2	1	1	1	4	1	1	1.57143
482	21	1	3	1	2	2	#NULL!	2	#NULL!	2	2	3	2	3	4	3	3	2.85714
487	21	1	3	1	3	2	#NULL!	2	#NULL!	4	1	1	1	1	1	1	1	1
490	21	1	3	1	3	2	#NULL!	1	1	1	2	2	1	2	1	1	1	1.42857
497	21	1	4	1	2	2	#NULL!	1	2	2	4	2	2	4	3	1	1	2.42857
521	21	1	4	1	3	2	#NULL!	1	1	3	3	4	4	4	3	5	4	3.85714
527	21	1	3	1	2	2	#NULL!	1	1	2	3	2	2	3	2	2	2	2.28571
531	21	1	4	1	2	2	#NULL!	1	2	1	3	4	2	3	4	2	2	2.85714
532	21	1	4	1	1	2	#NULL!	1	1	1	1	1	1	2	3	1	1	1.42857
535	21	1	3	1	3	2	#NULL!	1	1	1	1	2	2	2	2	1	1	1.57143
536	21	1	4	1	2	2	#NULL!	1	1	4	2	4	1	2	3	1	1	2
542	21	1	4	1	1	2	#NULL!	2	#NULL!	1	3	2	1	2	2	1	1	1.71429
575	21	1	3	1	3	2	#NULL!	2	#NULL!	1	1	3	1	1	3	1	1	1.57143
578	21	1	4	1	2	2	#NULL!	2	#NULL!	1	2	2	1	2	3	1	1	1.71429
587	21	1	4	1	3	2	#NULL!	1	1	4	1	2	1	1	1	1	1	1.14286
593	21	1	4	2	3	2	#NULL!	2	#NULL!	4	2	2	2	2	2	2	2	2
604	21	1	4	1	2	2	#NULL!	1	2	2	5	4	2	3	2	1	1	2.57143
614	21	1	3	1	2	2	#NULL!	1	1	1	3	2	1	1	3	1	1	1.71429
618	21	1	4	1	3	2	#NULL!	1	1	2	1	1	1	2	4	1	2	1.71429
623	21	1	3	1	1	2	#NULL!	2	#NULL!	1	4	4	2	4	3	1	1	2.71429
626	21	1	3	1	3	2	#NULL!	1	1	1	3	3	2	2	4	2	2	2.57143
628	21	1	4	1	3	2	#NULL!	1	2	4	5	4	2	1	4	2	4	3.14286
636	21	1	3	2	3	2	#NULL!	1	1	4	2	3	1	2	4	2	1	2.14286
640	21	1	3	1	3	2	#NULL!	1	1	2	2	1	1	1	1	1	1	1.14286
670	21	1	3	1	2	2	#NULL!	1	2	1	2	2	1	1	2	1	1	1.42857
674	21	1	4	1	2	2	#NULL!	1	2	3	5	4	2	2	4	1	1	2.71429
680	21	1	3	1	1	2	#NULL!	1	1	4	2	3	1	2	2	1	1	1.71429
684	21	1	4	1	2	2	#NULL!	1	1	1	5	4	1	2	5	1	3	3
687	21	1	4	2	2	2	#NULL!	2	#NULL!	3	1	1	1	1	1	1	1	1
698	21	1	3	1	1	2	#NULL!	2	#NULL!	1	1	2	1	1	1	1	1	1.14286
699	21	1	3	2	1	2	#NULL!	2	#NULL!	1	4	4	2	2	4	1	1	2.57143
703	21	1	4	1	1	2	#NULL!	2	#NULL!	3	2	2	2	2	4	2	2	2.28571
724	21	1	4	1	2	2	#NULL!	2	#NULL!	4	4	4	1	4	5	1	1	2.85714
726	21	1	4	1	2	2	#NULL!	1	2	4	4	3	1	5	3	1	1	2.57143
731	21	1	4	1	2	2	#NULL!	1	2	4	5	4	2	3	2	2	2	2.85714
732	21	1	3	2	1	2	#NULL!	1	1	4	2	1	1	1	3	1	1	1.42857
741	21	1	3	1	2	2	#NULL!	1	2	2	1	1	1	1	5	1	1	1.57143
745	21	1	4	2	3	2	#NULL!	1	1	3	4	4	2	3	4	2	2	3
752	21	1	4	1	3	2	#NULL!	2	#NULL!	1	3	3	3	3	3	2	2	2.71429
757	21	1	4	1	2	2	#NULL!	2	#NULL!	4	1	1	1	1	1	1	1	1
786	21	1	4	1	2	2	#NULL!	1	1	4	3	1	1	2	3	1	1	1.71429
789	21	1	4	1	2	2	#NULL!	1	1	4	2	2	1	1	1	1	1	1.28571
795	21	1	3	1	1	2	#NULL!	1	1	1	2	3	1	1	3	1	1	1.71429
819	21	1	4	1	2	2	#NULL!	1	1	4	2	3	1	2	3	1	1	1.85714
829	21	1	4	1	1	2	#NULL!	2	#NULL!	3	4	3	3	5	3	4	4	3.71429
832	21	1	3	1	3	2	#NULL!	2	#NULL!	1	3	2	1	2	2	1	1	1.71429
837	21	1	3	1	2	2	#NULL!	1	2	4	2	3	1	2	3	1	1	1.85714
847	21	1	4	1	1	2	#NULL!	2	#NULL!	1	1	1	1	1	1	1	1	1
859	21	1	4	1	2	2	#NULL!	1	2	1	3	4	2	3	4	4	4	3.42857
863	21	1	3	1	3	2	#NULL!	2	#NULL!	4	2	2	1	2	5	1	1	2
866	21	1	4	1	3	2	#NULL!	2	#NULL!	3	1	1	1	1	2	1	1	1.14286
868	21	1	4	2	2	2	#NULL!	1	2	4	1	4	1	1	1	1	1	1.42857
875	21	1	4	1	2	2	#NULL!	1	1	4	2	3	1	1	2	1	1	1.57143
877	21	1	4	1	2	2	#NULL!	2	#NULL!	1	1	2	1	2	1	1	1	1.28571
888	21	1	3	1	2	2	#NULL!	1	1	1	1	1	1	1	1	1	1	1
894	21	1	4	1	2	2	#NULL!	1	1	4	2	2	1	1	2	1	1	1.42857
895	21	1	4	1	2	2	#NULL!	1	2	4	4	4	3	5	4	3	2	3.57143
897	21	1	4	1	3	2	#NULL!	1	1	4	3	2	2	3	2	1	1	2
899	21	1	4	2	3	2	#NULL!	1	2	4	2	2	2	2	2	1	2	1.85714
939	21	1	3	1	2	2	#NULL!	2	#NULL!	3	2	2	1	1	2	1	1	1.42857
947	21	1	4	1	2	2	#NULL!	1	1	1	2	3	1	1	2	1	1	1.57143
964	21	1	3	1	2	2	#NULL!	2	#NULL!	2	2	3	2	3	4	2	2	2.57143
969	21	1	3	2	3	2	#NULL!	2	#NULL!	4	4	4	2	3	4	2	2	3
996	21	1	3	2	3	2	#NULL!	1	2	1	2	3	1	1	2	1	1	1.57143
997	21	1	4	1	3	2	#NULL!	1	2	1	4	3	2	3	3	1	2	2.57143
32	21	2	4	1	2	1	1	1	2	4	4	3	2	2	3	1	1	2.28571
114	21	2	4	1	2	1	2	1	2	2	2	3	2	2	4	2	3	2.57143
144	21	2	4	1	1	1	1	1	1	4	1	1	1	1	1	1	1	1
601	21	2	4	1	2	1	1	1	1	2	1	3	3	2	2	1	1	1.85714
801	21	2	3	1	3	1	1	1	2	3	2	3	1	1	4	1	1	1.85714
6	21	2	4	1	1	2	#NULL!	1	1	1	4	4	2	1	3	1	2	2.42857
51	21	2	3	1	2	2	#NULL!	1	1	4	1	1	1	1	1	1	1	1
67	21	2	4	1	2	2	#NULL!	1	1	1	1	5	1	1	1	1	1	1.57143
95	21	2	4	1	3	2	#NULL!	1	1	3	2	2	2	1	2	1	1	1.57143
103	21	2	3	1	2	2	#NULL!	2	#NULL!	3	3	4	1	2	1	1	1	1.85714
127	21	2	4	1	3	2	#NULL!	1	1	4	1	2	1	1	1	1	1	1.14286
162	21	2	4	1	2	2	#NULL!	1	2	2	3	3	2	4	4	2	4	3.14286
164	21	2	3	2	1	2	#NULL!	1	1	3	1	2	2	2	2	2	2	1.85714
200	21	2	4	1	1	2	#NULL!	2	#NULL!	1	4	4	4	4	3	4	3	3.71429
238	21	2	3	1	3	2	#NULL!	2	#NULL!	1	2	2	2	2	4	2	2	2.28571
290	21	2	4	2	2	2	#NULL!	2	#NULL!	1	1	1	1	1	1	1	1	1
291	21	2	4	2	3	2	#NULL!	1	1	4	2	3	1	1	2	1	1	1.57143
303	21	2	4	1	3	2	#NULL!	1	1	1	1	1	1	1	1	1	1	1
330	21	2	3	1	2	2	#NULL!	1	1	4	1	1	1	1	4	1	2	1.57143
344	21	2	4	1	1	2	#NULL!	2	#NULL!	4	1	1	1	1	1	1	1	1
399	21	2	3	1	2	2	#NULL!	2	#NULL!	4	2	4	1	1	1	1	1	1.57143
402	21	2	3	1	1	2	#NULL!	2	#NULL!	2	2	2	1	1	2	1	1	1.42857
424	21	2	4	1	3	2	#NULL!	2	#NULL!	3	2	3	1	1	3	2	2	2
429	21	2	3	1	3	2	#NULL!	1	1	4	3	1	1	1	1	1	1	1.28571
455	21	2	3	1	2	2	#NULL!	1	1	2	3	4	3	3	2	2	2	2.71429
474	21	2	3	1	2	2	#NULL!	1	2	1	1	2	1	1	2	1	1	1.28571
484	21	2	3	1	3	2	#NULL!	1	1	4	2	4	2	1	4	1	1	2.14286
499	21	2	3	1	1	2	#NULL!	2	#NULL!	1	1	3	1	1	1	1	1	1.28571
509	21	2	4	1	1	2	#NULL!	2	#NULL!	2	3	1	1	1	1	1	1	1.28571
540	21	2	4	1	3	2	#NULL!	1	1	3	4	2	4	3	2	3	1	2.71429
558	21	2	3	1	2	2	#NULL!	2	#NULL!	1	3	4	2	3	4	2	2	2.85714
559	21	2	3	1	3	2	#NULL!	2	#NULL!	4	3	3	3	3	3	3	4	3.14286
573	21	2	3	1	3	2	#NULL!	1	2	4	2	2	1	1	2	1	1	1.42857
580	21	2	3	2	2	2	#NULL!	1	1	1	2	2	1	1	1	1	1	1.28571
582	21	2	3	1	1	2	#NULL!	2	#NULL!	4	2	3	1	1	1	1	1	1.42857
600	21	2	4	1	3	2	#NULL!	2	#NULL!	3	2	2	1	1	4	1	2	1.85714
608	21	2	4	1	2	2	#NULL!	1	2	2	1	2	1	1	2	1	1	1.28571
617	21	2	3	1	3	2	#NULL!	2	#NULL!	4	1	2	1	1	1	1	1	1.14286
638	21	2	4	1	3	2	#NULL!	2	#NULL!	4	1	1	1	1	1	1	1	1
667	21	2	4	2	2	2	#NULL!	2	#NULL!	4	2	2	2	2	2	1	2	1.85714
669	21	2	4	1	2	2	#NULL!	1	1	3	2	3	2	2	2	2	1	2
693	21	2	4	1	2	2	#NULL!	1	2	1	1	1	1	1	1	1	1	1
700	21	2	3	1	2	2	#NULL!	1	1	4	3	2	1	2	2	1	1	1.71429
704	21	2	4	1	2	2	#NULL!	2	#NULL!	1	1	1	1	1	1	1	1	1
737	21	2	4	2	3	2	#NULL!	2	#NULL!	4	3	2	3	4	5	5	3	3.57143
766	21	2	3	2	2	2	#NULL!	2	#NULL!	4	3	1	3	3	4	1	2	2.42857
774	21	2	3	1	2	2	#NULL!	2	#NULL!	1	3	2	1	2	2	1	1	1.71429
840	21	2	4	1	1	2	#NULL!	1	2	1	2	3	1	1	1	1	1	1.42857
842	21	2	4	1	2	2	#NULL!	2	#NULL!	1	2	2	2	2	2	2	2	2
850	21	2	3	1	3	2	#NULL!	2	#NULL!	1	2	3	1	2	2	1	2	1.85714
856	21	2	4	1	1	2	#NULL!	1	2	4	2	2	2	2	2	2	2	2
870	21	2	3	1	2	2	#NULL!	1	2	4	1	1	1	1	1	1	1	1
902	21	2	4	1	3	2	#NULL!	1	1	4	2	2	1	1	2	2	2	1.71429
908	21	2	3	1	1	2	#NULL!	1	2	4	3	4	1	3	4	1	2	2.57143
909	21	2	3	1	3	2	#NULL!	1	2	1	3	3	3	3	3	3	3	3
914	21	2	4	1	3	2	#NULL!	1	2	4	4	3	3	2	3	1	1	2.42857
917	21	2	3	1	3	2	#NULL!	1	1	1	2	3	3	5	3	4	3	3.28571
919	21	2	4	1	2	2	#NULL!	1	1	4	1	1	1	1	5	1	1	1.57143
952	21	2	4	1	2	2	#NULL!	2	#NULL!	2	3	4	1	3	3	1	1	2.28571
974	21	2	3	1	3	2	#NULL!	2	#NULL!	3	4	4	2	4	4	1	2	3
976	21	2	3	1	2	2	#NULL!	2	#NULL!	4	4	4	1	3	4	3	3	3.14286
980	21	2	4	1	2	2	#NULL!	1	2	2	2	2	2	2	2	2	2	2
989	21	2	4	1	1	2	#NULL!	2	#NULL!	4	2	2	2	1	1	1	1	1.42857
60	22	1	3	2	4	1	1	1	2	1	1	1	2	1	2	1	1	1.28571
376	22	1	3	1	3	1	1	1	1	1	4	4	1	3	2	1	1	2.28571
434	22	1	3	3	1	1	1	1	2	4	2	2	1	2	2	2	2	1.85714
634	22	1	3	1	3	1	1	1	2	1	2	2	2	3	2	1	1	1.85714
709	22	1	4	2	4	1	2	1	2	1	3	2	1	3	4	2	1	2.28571
890	22	1	4	1	3	1	1	1	2	2	2	4	2	3	2	2	3	2.57143
959	22	1	4	1	3	1	2	1	2	4	3	4	1	3	3	2	4	2.85714
2	22	1	4	1	1	2	#NULL!	1	1	2	2	4	1	1	2	1	1	1.71429
17	22	1	4	2	3	2	#NULL!	1	2	4	2	4	1	1	1	1	1	1.57143
25	22	1	3	1	3	2	#NULL!	1	1	2	2	3	1	1	1	1	1	1.42857
39	22	1	4	1	2	2	#NULL!	2	#NULL!	4	1	1	1	1	2	1	1	1.14286
53	22	1	4	2	2	2	#NULL!	1	1	4	1	1	1	1	1	1	1	1
61	22	1	4	3	1	2	#NULL!	1	2	1	3	3	3	3	3	3	3	3
90	22	1	4	1	3	2	#NULL!	1	2	1	1	1	1	1	1	1	1	1
126	22	1	4	3	1	2	#NULL!	1	2	4	2	2	2	2	2	2	2	2
136	22	1	4	1	3	2	#NULL!	2	#NULL!	1	1	1	1	3	1	1	1	1.28571
139	22	1	4	1	3	2	#NULL!	1	1	4	4	4	2	2	4	2	3	3
148	22	1	3	1	3	2	#NULL!	2	#NULL!	1	3	2	1	3	2	2	2	2.14286
167	22	1	4	1	3	2	#NULL!	1	2	4	1	1	1	1	1	1	1	1
169	22	1	4	1	3	2	#NULL!	2	#NULL!	4	2	4	1	1	3	1	2	2
173	22	1	4	1	3	2	#NULL!	2	#NULL!	4	3	4	1	3	4	2	2	2.71429
202	22	1	3	2	3	2	#NULL!	1	1	1	2	3	1	1	4	1	1	1.85714
203	22	1	3	1	3	2	#NULL!	1	1	1	1	4	1	1	4	1	1	1.85714
212	22	1	3	1	3	2	#NULL!	1	1	2	3	2	2	1	4	1	1	2
219	22	1	3	1	2	2	#NULL!	1	1	4	3	3	1	3	3	1	4	2.57143
239	22	1	3	1	2	2	#NULL!	1	1	4	4	3	1	3	3	1	1	2.28571
241	22	1	4	1	3	2	#NULL!	1	1	3	2	1	1	3	2	1	1	1.57143
249	22	1	4	1	3	2	#NULL!	1	1	4	2	2	2	2	3	1	2	2
257	22	1	4	3	1	2	#NULL!	1	1	4	3	5	1	2	3	4	1	2.71429
267	22	1	3	1	2	2	#NULL!	2	#NULL!	3	2	2	1	2	3	1	2	1.85714
271	22	1	3	1	1	2	#NULL!	1	2	1	4	3	2	4	4	1	1	2.71429
276	22	1	4	3	1	2	#NULL!	2	#NULL!	4	3	2	1	1	2	1	1	1.57143
280	22	1	4	1	3	2	#NULL!	1	2	1	2	2	1	1	1	1	1	1.28571
281	22	1	3	3	1	2	#NULL!	1	1	4	5	4	1	1	4	2	3	2.85714
287	22	1	4	1	3	2	#NULL!	1	2	1	1	1	1	1	1	1	1	1
299	22	1	4	3	1	2	#NULL!	2	#NULL!	1	4	3	3	2	2	1	1	2.28571
300	22	1	3	3	1	2	#NULL!	1	2	1	1	4	1	1	2	1	1	1.57143
317	22	1	3	1	4	2	#NULL!	1	1	3	2	3	1	3	5	1	2	2.42857
323	22	1	3	3	1	2	#NULL!	2	#NULL!	1	3	4	1	2	4	1	1	2.28571
332	22	1	3	1	3	2	#NULL!	1	1	1	2	2	2	1	2	1	1	1.57143
353	22	1	3	2	4	2	#NULL!	2	#NULL!	2	4	4	2	2	4	2	2	2.85714
354	22	1	3	3	1	2	#NULL!	2	#NULL!	2	2	4	2	2	4	1	1	2.28571
385	22	1	3	2	1	2	#NULL!	1	1	2	3	3	1	2	3	1	1	2
389	22	1	4	1	3	2	#NULL!	1	2	2	4	3	2	3	2	1	1	2.28571
419	22	1	4	1	2	2	#NULL!	1	1	1	4	4	2	4	4	2	2	3.14286
426	22	1	3	3	1	2	#NULL!	2	#NULL!	4	3	3	1	2	3	1	1	2
439	22	1	3	2	1	2	#NULL!	1	1	2	1	1	1	1	1	1	1	1
446	22	1	3	2	4	2	#NULL!	2	#NULL!	4	1	1	1	1	1	1	1	1
473	22	1	4	2	4	2	#NULL!	1	1	1	2	2	1	2	3	1	2	1.85714
477	22	1	3	2	4	2	#NULL!	2	#NULL!	1	4	1	1	1	4	1	1	1.85714
491	22	1	3	1	3	2	#NULL!	1	2	4	2	2	1	2	4	1	2	2
496	22	1	3	2	3	2	#NULL!	1	2	1	2	3	2	2	3	2	2	2.28571
534	22	1	4	1	3	2	#NULL!	1	1	4	1	3	1	1	3	1	1	1.57143
548	22	1	4	2	4	2	#NULL!	1	1	2	3	4	2	3	3	1	1	2.42857
550	22	1	3	1	2	2	#NULL!	1	1	1	4	3	1	1	2	1	1	1.85714
561	22	1	4	1	3	2	#NULL!	2	#NULL!	4	2	1	1	1	1	1	1	1.14286
563	22	1	4	2	1	2	#NULL!	1	1	1	3	3	2	2	3	2	2	2.42857
598	22	1	4	3	1	2	#NULL!	2	#NULL!	3	2	2	2	1	5	1	2	2.14286
599	22	1	3	2	4	2	#NULL!	1	2	2	3	2	3	3	4	2	3	2.85714
645	22	1	3	1	3	2	#NULL!	2	#NULL!	4	3	3	1	1	2	2	3	2.14286
656	22	1	4	2	1	2	#NULL!	1	2	4	4	4	4	4	4	2	4	3.71429
659	22	1	3	1	3	2	#NULL!	1	1	4	3	4	2	3	4	2	4	3.14286
662	22	1	3	3	1	2	#NULL!	1	2	1	1	1	1	1	5	1	1	1.57143
672	22	1	3	1	3	2	#NULL!	1	1	4	2	2	1	1	2	1	1	1.42857
692	22	1	3	1	2	2	#NULL!	1	2	2	4	4	2	3	4	3	5	3.57143
721	22	1	4	1	2	2	#NULL!	1	1	1	5	5	2	5	5	2	2	3.71429
728	22	1	3	2	4	2	#NULL!	1	1	1	2	4	2	1	2	1	1	1.85714
734	22	1	4	1	3	2	#NULL!	1	1	4	4	1	1	2	3	1	1	1.85714
742	22	1	4	1	3	2	#NULL!	2	#NULL!	4	3	3	2	3	4	2	3	2.85714
747	22	1	3	2	1	2	#NULL!	1	1	1	1	1	1	1	1	1	1	1
749	22	1	4	3	1	2	#NULL!	1	1	4	1	3	1	1	3	1	1	1.57143
760	22	1	3	3	1	2	#NULL!	1	1	1	3	3	2	2	3	2	2	2.42857
763	22	1	4	1	1	2	#NULL!	1	1	4	3	2	1	2	3	1	1	1.85714
765	22	1	4	1	3	2	#NULL!	1	2	3	3	3	1	2	2	1	2	2
768	22	1	3	1	3	2	#NULL!	2	#NULL!	4	4	4	2	4	4	1	1	2.85714
777	22	1	4	1	3	2	#NULL!	2	#NULL!	4	3	2	1	4	3	1	1	2.14286
785	22	1	3	1	3	2	#NULL!	1	2	4	2	4	2	2	3	1	2	2.28571
788	22	1	4	1	3	2	#NULL!	1	1	4	5	5	1	5	5	1	3	3.57143
790	22	1	3	3	1	2	#NULL!	1	2	1	3	2	1	2	3	2	1	2
800	22	1	4	1	3	2	#NULL!	1	2	1	4	4	3	4	3	4	3	3.57143
814	22	1	3	1	3	2	#NULL!	2	#NULL!	4	3	3	1	2	3	1	1	2
827	22	1	3	1	2	2	#NULL!	1	1	3	3	2	1	1	3	1	3	2
828	22	1	4	1	2	2	#NULL!	2	#NULL!	4	2	2	1	3	2	1	2	1.85714
834	22	1	4	1	1	2	#NULL!	1	1	1	2	1	1	1	1	1	1	1.14286
869	22	1	4	1	3	2	#NULL!	1	1	4	2	1	1	1	1	1	1	1.14286
937	22	1	3	1	3	2	#NULL!	2	#NULL!	1	2	3	1	1	3	1	1	1.71429
943	22	1	4	1	2	2	#NULL!	2	#NULL!	4	2	3	1	2	3	2	1	2
965	22	1	3	1	3	2	#NULL!	2	#NULL!	1	3	4	3	3	2	2	2	2.71429
979	22	1	4	1	3	2	#NULL!	1	2	4	2	1	1	2	1	1	1	1.28571
981	22	1	3	1	3	2	#NULL!	1	1	1	3	4	2	3	3	2	2	2.71429
983	22	1	4	2	2	2	#NULL!	1	1	3	2	3	2	2	1	1	1	1.71429
993	22	1	3	1	2	2	#NULL!	1	1	4	2	2	2	2	3	2	2	2.14286
994	22	1	4	1	3	2	#NULL!	1	2	1	3	4	2	4	4	1	2	2.85714
22	22	2	3	1	3	1	1	1	1	2	1	1	1	1	1	1	1	1
406	22	2	4	2	3	1	1	1	2	1	2	3	1	1	1	1	1	1.42857
493	22	2	4	1	3	1	1	1	1	4	2	3	2	1	2	1	1	1.71429
673	22	2	4	2	4	1	2	1	2	4	1	1	1	1	1	1	1	1
5	22	2	3	1	1	2	#NULL!	2	#NULL!	4	1	1	1	1	1	1	1	1
59	22	2	4	3	1	2	#NULL!	2	#NULL!	3	1	1	1	1	1	1	1	1
130	22	2	3	1	3	2	#NULL!	1	1	1	2	1	1	1	2	1	1	1.28571
168	22	2	3	3	1	2	#NULL!	2	#NULL!	1	3	4	5	5	4	3	5	4.14286
198	22	2	3	1	3	2	#NULL!	2	#NULL!	1	3	4	1	2	4	1	1	2.28571
223	22	2	3	1	1	2	#NULL!	2	#NULL!	4	2	3	1	1	4	2	2	2.14286
256	22	2	4	1	3	2	#NULL!	1	1	3	2	2	2	2	2	2	2	2
286	22	2	4	1	1	2	#NULL!	2	#NULL!	1	2	1	1	1	2	1	1	1.28571
301	22	2	4	1	3	2	#NULL!	2	#NULL!	2	3	4	2	2	3	2	2	2.57143
338	22	2	4	2	4	2	#NULL!	1	1	4	3	2	1	1	2	1	1	1.57143
374	22	2	3	1	2	2	#NULL!	1	1	1	3	2	1	1	2	1	1	1.57143
394	22	2	4	1	2	2	#NULL!	2	#NULL!	2	4	2	2	3	3	1	1	2.28571
395	22	2	3	2	4	2	#NULL!	2	#NULL!	4	3	3	1	1	1	1	1	1.57143
404	22	2	4	1	3	2	#NULL!	2	#NULL!	1	1	2	1	1	2	1	2	1.42857
442	22	2	4	3	1	2	#NULL!	2	#NULL!	4	3	3	2	2	3	2	2	2.42857
501	22	2	3	1	2	2	#NULL!	1	1	1	1	1	1	1	1	1	1	1
510	22	2	4	1	1	2	#NULL!	2	#NULL!	4	1	1	1	1	1	1	1	1
518	22	2	4	3	1	2	#NULL!	2	#NULL!	4	2	3	1	1	4	2	1	2
539	22	2	4	1	3	2	#NULL!	1	2	1	2	2	1	1	1	1	1	1.28571
566	22	2	4	1	3	2	#NULL!	1	2	2	2	4	1	1	1	1	1	1.57143
581	22	2	3	3	1	2	#NULL!	1	2	1	4	3	1	1	2	3	1	2.14286
592	22	2	4	3	1	2	#NULL!	1	1	2	2	3	2	2	3	2	2	2.28571
624	22	2	4	1	3	2	#NULL!	1	1	4	4	4	3	3	5	2	3	3.42857
630	22	2	3	1	3	2	#NULL!	1	1	1	1	1	1	1	1	1	1	1
632	22	2	3	2	4	2	#NULL!	1	1	3	4	5	1	2	4	1	2	2.71429
633	22	2	3	1	3	2	#NULL!	1	1	2	1	2	1	1	1	1	1	1.14286
646	22	2	4	1	3	2	#NULL!	2	#NULL!	1	1	1	1	1	1	1	1	1
679	22	2	3	1	3	2	#NULL!	1	1	4	1	1	1	1	1	1	1	1
739	22	2	3	1	2	2	#NULL!	1	1	2	2	2	1	1	1	1	1	1.28571
761	22	2	4	1	1	2	#NULL!	1	1	2	1	1	1	1	1	1	1	1
836	22	2	3	1	3	2	#NULL!	1	1	4	3	3	1	1	3	1	1	1.85714
857	22	2	3	1	2	2	#NULL!	2	#NULL!	3	3	4	2	2	2	2	2	2.42857
911	22	2	3	1	3	2	#NULL!	2	#NULL!	1	1	4	1	2	3	1	1	1.85714
918	22	2	4	1	3	2	#NULL!	1	2	4	2	1	1	1	5	4	1	2.14286
920	22	2	4	1	2	2	#NULL!	1	1	3	3	3	3	3	3	3	3	3
921	22	2	3	1	3	2	#NULL!	1	2	4	3	2	2	2	2	2	2	2.14286
927	22	2	3	1	3	2	#NULL!	1	2	1	1	2	1	1	5	1	1	1.71429
931	22	2	4	2	2	2	#NULL!	2	#NULL!	3	1	2	1	1	1	1	1	1.14286
932	22	2	4	1	3	2	#NULL!	2	#NULL!	1	2	2	2	2	2	2	2	2
941	22	2	4	1	3	2	#NULL!	1	1	4	3	4	1	2	3	2	1	2.28571
950	22	2	3	1	2	2	#NULL!	2	#NULL!	3	3	3	3	3	3	3	3	3
7	23	1	4	3	1	1	1	1	1	4	2	2	2	2	2	2	2	2
122	23	1	4	1	3	1	1	1	1	1	3	3	2	3	2	2	2	2.42857
176	23	1	4	2	5	1	2	1	2	4	4	4	4	5	4	3	4	4
179	23	1	4	3	1	1	1	1	1	4	2	2	1	2	2	2	1	1.71429
360	23	1	4	2	5	1	1	1	1	3	2	2	2	2	2	2	2	2
449	23	1	4	2	2	1	1	1	2	3	1	1	1	1	1	1	1	1
454	23	1	3	1	2	1	2	1	2	4	4	4	4	2	4	2	2	3.14286
610	23	1	3	3	1	1	1	1	2	1	3	2	1	3	2	2	1	2
649	23	1	3	3	2	1	1	1	1	1	1	1	1	1	5	1	1	1.57143
655	23	1	4	3	1	1	1	1	1	4	2	3	1	1	3	1	1	1.71429
9	23	1	3	2	5	2	#NULL!	1	1	2	3	3	1	3	2	1	1	2
12	23	1	3	2	4	2	#NULL!	1	1	4	3	2	1	1	2	1	2	1.71429
15	23	1	4	1	2	2	#NULL!	2	#NULL!	4	1	1	1	1	5	1	1	1.57143
26	23	1	3	3	2	2	#NULL!	1	2	1	3	3	2	2	3	2	2	2.42857
30	23	1	4	3	2	2	#NULL!	2	#NULL!	4	3	3	3	3	3	3	3	3
50	23	1	3	3	2	2	#NULL!	1	1	2	4	4	3	3	4	4	3	3.57143
64	23	1	4	3	1	2	#NULL!	1	2	4	3	1	1	1	1	1	1	1.28571
72	23	1	4	3	1	2	#NULL!	2	#NULL!	4	2	3	1	2	4	1	1	2
77	23	1	4	1	1	2	#NULL!	2	#NULL!	4	3	4	1	3	3	1	1	2.28571
78	23	1	3	3	1	2	#NULL!	1	1	4	2	4	2	2	4	1	1	2.28571
106	23	1	4	3	2	2	#NULL!	1	1	4	2	2	1	3	2	1	1	1.71429
115	23	1	3	1	3	2	#NULL!	1	1	1	4	4	2	4	3	3	3	3.28571
118	23	1	4	2	1	2	#NULL!	2	#NULL!	1	1	3	1	1	4	4	1	2.14286
128	23	1	3	2	4	2	#NULL!	1	1	1	2	1	1	1	1	1	1	1.14286
145	23	1	4	2	3	2	#NULL!	1	2	4	1	1	1	1	1	1	1	1
155	23	1	3	3	2	2	#NULL!	2	#NULL!	1	3	3	2	3	2	2	2	2.42857
184	23	1	4	3	1	2	#NULL!	1	2	1	4	2	1	4	3	1	1	2.28571
204	23	1	4	1	1	2	#NULL!	2	#NULL!	4	1	1	1	1	1	1	1	1
218	23	1	3	2	4	2	#NULL!	1	1	1	2	2	1	2	2	1	1	1.57143
232	23	1	3	3	1	2	#NULL!	2	#NULL!	2	3	4	1	1	3	1	2	2.14286
236	23	1	3	3	1	2	#NULL!	1	2	1	1	1	1	1	4	1	1	1.42857
243	23	1	4	1	2	2	#NULL!	1	2	2	3	4	1	4	4	1	1	2.57143
248	23	1	3	3	1	2	#NULL!	1	2	4	4	2	2	4	3	2	2	2.71429
250	23	1	3	3	1	2	#NULL!	1	2	2	5	3	2	3	4	2	4	3.28571
255	23	1	4	1	2	2	#NULL!	1	1	4	2	1	1	1	2	1	1	1.28571
258	23	1	3	1	2	2	#NULL!	2	#NULL!	2	3	2	2	4	4	2	2	2.71429
263	23	1	3	1	3	2	#NULL!	1	1	4	1	1	1	1	1	1	1	1
270	23	1	4	1	3	2	#NULL!	1	1	2	3	2	1	2	2	2	2	2
304	23	1	3	1	1	2	#NULL!	1	1	4	4	4	1	1	4	1	2	2.42857
307	23	1	3	1	2	2	#NULL!	1	1	3	4	4	1	3	1	1	2	2.28571
312	23	1	3	3	2	2	#NULL!	1	2	1	2	2	2	3	1	1	1	1.71429
319	23	1	3	3	1	2	#NULL!	2	#NULL!	3	2	3	1	1	3	1	1	1.71429
322	23	1	4	3	1	2	#NULL!	1	2	3	3	4	1	4	4	1	1	2.57143
329	23	1	4	3	2	2	#NULL!	1	1	4	2	1	1	3	4	1	2	2
340	23	1	3	1	3	2	#NULL!	2	#NULL!	2	2	2	2	2	3	2	2	2.14286
357	23	1	3	1	4	2	#NULL!	2	#NULL!	1	2	4	2	2	4	1	1	2.28571
384	23	1	3	3	2	2	#NULL!	2	#NULL!	2	2	3	2	2	3	2	2	2.28571
386	23	1	3	3	1	2	#NULL!	1	2	1	2	2	2	4	4	1	2	2.42857
401	23	1	4	1	3	2	#NULL!	2	#NULL!	4	2	2	2	2	2	1	1	1.71429
409	23	1	4	3	2	2	#NULL!	1	2	4	2	2	1	1	2	1	1	1.42857
418	23	1	4	3	1	2	#NULL!	1	2	4	4	4	3	4	4	2	1	3.14286
420	23	1	3	2	2	2	#NULL!	2	#NULL!	4	1	1	1	1	1	1	1	1
432	23	1	3	3	1	2	#NULL!	2	#NULL!	2	2	1	1	2	2	2	1	1.57143
444	23	1	3	3	1	2	#NULL!	2	#NULL!	1	2	4	3	1	5	1	5	3
448	23	1	4	3	1	2	#NULL!	1	1	1	1	1	1	1	1	1	1	1
478	23	1	3	1	3	2	#NULL!	1	1	2	1	1	1	1	5	1	1	1.57143
506	23	1	4	1	2	2	#NULL!	2	#NULL!	1	3	2	1	2	3	1	2	2
514	23	1	3	1	1	2	#NULL!	1	2	1	4	4	2	5	3	1	3	3.14286
526	23	1	3	3	1	2	#NULL!	2	#NULL!	4	2	4	1	2	3	1	3	2.28571
543	23	1	4	2	3	2	#NULL!	1	2	2	2	5	2	5	4	1	1	2.85714
557	23	1	4	3	2	2	#NULL!	1	1	3	3	3	1	1	3	1	1	1.85714
571	23	1	3	3	2	2	#NULL!	2	#NULL!	1	4	3	2	4	4	2	3	3.14286
574	23	1	4	3	2	2	#NULL!	1	1	4	2	2	1	2	2	2	2	1.85714
620	23	1	3	3	2	2	#NULL!	1	2	4	4	4	2	2	4	2	2	2.85714
627	23	1	4	3	2	2	#NULL!	1	2	1	2	2	1	3	2	1	1	1.71429
635	23	1	3	3	1	2	#NULL!	1	2	4	1	4	4	2	3	4	1	2.71429
650	23	1	3	2	4	2	#NULL!	2	#NULL!	1	4	4	2	1	4	2	1	2.57143
654	23	1	4	2	5	2	#NULL!	1	1	2	2	2	1	1	2	2	2	1.71429
666	23	1	4	2	4	2	#NULL!	1	1	1	2	5	3	1	3	4	1	2.71429
683	23	1	4	1	3	2	#NULL!	1	2	1	5	5	5	5	5	5	5	5
710	23	1	4	1	3	2	#NULL!	1	2	4	1	1	1	1	2	1	1	1.14286
720	23	1	4	3	2	2	#NULL!	1	2	4	2	2	1	1	1	1	1	1.28571
743	23	1	3	1	1	2	#NULL!	2	#NULL!	3	1	1	1	1	1	1	1	1
748	23	1	4	1	2	2	#NULL!	1	2	4	2	1	1	1	1	1	1	1.14286
750	23	1	4	1	2	2	#NULL!	1	2	1	2	1	1	3	2	1	1	1.57143
772	23	1	3	3	1	2	#NULL!	2	#NULL!	1	1	1	1	1	2	1	1	1.14286
813	23	1	4	3	2	2	#NULL!	1	1	4	3	3	1	3	3	2	2	2.42857
833	23	1	3	2	4	2	#NULL!	1	1	1	2	3	1	2	2	1	1	1.71429
839	23	1	3	2	1	2	#NULL!	1	2	1	3	2	1	2	3	1	2	2
843	23	1	3	2	4	2	#NULL!	2	#NULL!	1	3	3	3	3	3	3	3	3
844	23	1	4	3	1	2	#NULL!	2	#NULL!	1	1	2	1	1	1	1	3	1.42857
849	23	1	4	2	1	2	#NULL!	2	#NULL!	1	1	1	1	1	1	1	1	1
858	23	1	4	3	1	2	#NULL!	1	2	1	3	2	2	3	4	2	2	2.57143
860	23	1	4	1	3	2	#NULL!	1	1	2	4	5	2	2	4	4	4	3.57143
883	23	1	3	3	1	2	#NULL!	2	#NULL!	1	1	1	1	1	1	1	1	1
886	23	1	3	3	2	2	#NULL!	1	1	4	2	2	1	2	2	1	1	1.57143
893	23	1	4	3	2	2	#NULL!	1	2	1	1	4	2	2	3	1	1	2
934	23	1	3	1	1	2	#NULL!	1	1	1	1	1	1	1	4	1	1	1.42857
975	23	1	3	3	1	2	#NULL!	1	1	2	3	3	1	3	3	1	1	2.14286
119	23	2	3	1	3	1	2	1	2	4	5	4	1	2	3	1	1	2.42857
215	23	2	3	3	1	1	2	1	1	3	3	2	1	1	1	1	1	1.42857
397	23	2	4	3	2	1	1	1	2	4	5	5	3	2	2	3	3	3.28571
651	23	2	4	1	1	1	2	1	2	2	3	3	3	1	3	3	3	2.71429
831	23	2	3	3	2	1	2	1	2	4	3	4	2	2	2	2	2	2.42857
11	23	2	3	2	3	2	#NULL!	2	#NULL!	4	1	1	1	1	3	1	1	1.28571
28	23	2	3	1	1	2	#NULL!	1	1	3	3	2	1	2	1	1	1	1.57143
55	23	2	3	3	2	2	#NULL!	2	#NULL!	2	1	3	3	1	5	3	4	2.85714
70	23	2	4	1	1	2	#NULL!	1	1	4	2	2	1	3	2	1	2	1.85714
134	23	2	3	1	3	2	#NULL!	1	1	1	1	1	1	1	1	1	1	1
142	23	2	4	1	3	2	#NULL!	2	#NULL!	4	1	5	4	2	2	4	5	3.28571
180	23	2	4	1	2	2	#NULL!	1	1	2	2	1	1	1	1	1	1	1.14286
181	23	2	3	3	2	2	#NULL!	1	1	1	3	2	1	1	1	1	1	1.42857
199	23	2	4	2	1	2	#NULL!	1	1	2	2	3	4	3	4	3	2	3
224	23	2	4	2	1	2	#NULL!	1	1	1	2	2	2	2	2	2	2	2
225	23	2	4	1	1	2	#NULL!	1	1	1	1	1	1	1	1	1	1	1
237	23	2	4	1	3	2	#NULL!	1	1	4	4	4	3	5	3	4	2	3.57143
246	23	2	3	1	4	2	#NULL!	2	#NULL!	2	1	1	1	1	1	1	1	1
247	23	2	4	1	2	2	#NULL!	2	#NULL!	1	2	1	1	1	1	1	1	1.14286
367	23	2	4	1	3	2	#NULL!	1	1	2	2	2	2	2	2	2	2	2
405	23	2	4	1	3	2	#NULL!	2	#NULL!	4	3	2	2	2	2	2	2	2.14286
435	23	2	3	2	4	2	#NULL!	1	1	1	1	3	1	2	2	3	1	1.85714
437	23	2	4	2	1	2	#NULL!	1	2	3	2	3	1	1	4	1	1	1.85714
483	23	2	4	1	3	2	#NULL!	2	#NULL!	1	2	2	1	1	1	1	1	1.28571
500	23	2	3	3	1	2	#NULL!	1	2	3	2	2	1	2	2	2	1	1.71429
515	23	2	4	1	4	2	#NULL!	1	1	3	3	2	1	2	3	1	1	1.85714
549	23	2	4	3	1	2	#NULL!	2	#NULL!	4	1	4	1	4	4	1	1	2.28571
555	23	2	3	2	5	2	#NULL!	2	#NULL!	1	2	2	1	2	3	1	3	2
588	23	2	4	1	2	2	#NULL!	2	#NULL!	1	3	3	2	2	1	1	1	1.85714
590	23	2	3	1	3	2	#NULL!	2	#NULL!	1	4	1	1	3	4	1	1	2.14286
596	23	2	4	3	2	2	#NULL!	2	#NULL!	4	3	2	2	2	1	1	1	1.71429
643	23	2	4	3	1	2	#NULL!	1	2	1	2	3	1	2	3	1	1	1.85714
682	23	2	3	3	1	2	#NULL!	1	2	4	2	2	2	1	2	1	1	1.57143
735	23	2	4	2	5	2	#NULL!	2	#NULL!	1	3	5	1	2	4	4	2	3
754	23	2	3	1	3	2	#NULL!	2	#NULL!	3	2	2	1	1	2	2	1	1.57143
762	23	2	3	2	5	2	#NULL!	2	#NULL!	4	2	2	1	1	1	1	1	1.28571
807	23	2	3	1	3	2	#NULL!	2	#NULL!	4	2	2	2	2	2	2	2	2
838	23	2	3	3	1	2	#NULL!	2	#NULL!	1	3	3	2	2	3	3	3	2.71429
891	23	2	4	3	2	2	#NULL!	1	1	4	3	4	2	2	3	1	1	2.28571
924	23	2	3	3	1	2	#NULL!	1	1	4	3	2	1	2	2	2	1	1.85714
926	23	2	3	1	1	2	#NULL!	1	1	4	4	4	2	3	4	5	3	3.57143
951	23	2	3	2	4	2	#NULL!	2	#NULL!	3	1	2	1	1	1	1	1	1.14286
963	23	2	3	2	5	2	#NULL!	2	#NULL!	4	1	2	1	1	2	1	1	1.28571
45	24	1	3	1	1	1	2	1	2	3	3	5	5	2	5	4	3	3.85714
152	24	1	4	2	2	1	1	1	1	2	2	2	1	3	2	1	2	1.85714
177	24	1	3	3	1	1	2	1	2	4	3	4	2	2	4	1	1	2.42857
254	24	1	4	3	1	1	1	1	2	1	5	5	5	5	4	5	5	4.85714
383	24	1	4	3	2	1	1	1	1	2	3	4	1	5	4	1	2	2.85714
545	24	1	3	1	3	1	2	1	2	1	2	2	1	4	2	2	1	2
657	24	1	3	3	2	1	1	1	1	1	5	4	4	4	5	5	5	4.57143
696	24	1	4	1	1	1	1	1	1	3	2	2	1	1	1	1	1	1.28571
715	24	1	4	3	2	1	1	1	2	1	1	2	1	1	4	1	1	1.57143
805	24	1	4	3	1	1	1	1	2	1	3	2	1	3	2	1	2	2
816	24	1	4	3	2	1	1	1	1	3	3	2	1	2	2	1	1	1.71429
40	24	1	3	3	2	2	#NULL!	1	1	1	2	2	1	2	1	1	1	1.42857
137	24	1	4	3	2	2	#NULL!	1	2	2	3	2	1	2	2	1	1	1.71429
138	24	1	3	3	1	2	#NULL!	1	1	1	1	2	1	1	4	1	1	1.57143
150	24	1	4	3	2	2	#NULL!	1	1	3	1	1	1	1	4	1	1	1.42857
222	24	1	4	1	2	2	#NULL!	1	1	4	3	4	2	2	4	1	1	2.42857
240	24	1	4	1	2	2	#NULL!	1	1	1	2	2	1	1	2	1	1	1.42857
297	24	1	3	2	4	2	#NULL!	1	1	3	2	2	1	1	2	1	1	1.42857
298	24	1	3	3	1	2	#NULL!	2	#NULL!	4	1	1	1	1	1	1	1	1
306	24	1	4	1	3	2	#NULL!	2	#NULL!	4	1	4	1	1	5	1	1	2
310	24	1	4	1	3	2	#NULL!	1	2	3	4	4	3	4	4	2	3	3.42857
315	24	1	3	3	2	2	#NULL!	2	#NULL!	1	3	4	2	1	2	1	1	2
334	24	1	4	1	3	2	#NULL!	1	1	3	1	1	1	2	2	1	1	1.28571
355	24	1	4	1	3	2	#NULL!	2	#NULL!	1	1	1	1	1	1	1	1	1
356	24	1	3	3	1	2	#NULL!	1	1	1	4	4	1	2	4	1	2	2.57143
359	24	1	3	3	1	2	#NULL!	1	2	1	1	1	1	1	1	1	1	1
362	24	1	3	2	3	2	#NULL!	1	2	4	3	3	2	2	4	2	1	2.42857
375	24	1	3	1	3	2	#NULL!	2	#NULL!	1	3	4	2	4	4	3	3	3.28571
377	24	1	3	2	5	2	#NULL!	2	#NULL!	1	2	2	2	2	2	2	2	2
407	24	1	4	3	2	2	#NULL!	1	2	4	3	3	3	3	3	2	2	2.71429
443	24	1	4	3	1	2	#NULL!	1	2	1	1	1	1	2	1	1	1	1.14286
450	24	1	4	1	3	2	#NULL!	1	1	3	3	3	2	2	4	2	2	2.57143
453	24	1	4	3	2	2	#NULL!	1	2	4	1	1	1	1	1	1	1	1
485	24	1	3	1	3	2	#NULL!	1	2	1	3	3	3	3	3	3	3	3
546	24	1	4	3	2	2	#NULL!	2	#NULL!	4	2	2	1	2	2	2	1	1.71429
572	24	1	4	3	2	2	#NULL!	1	1	1	3	2	1	2	2	1	1	1.71429
597	24	1	3	1	2	2	#NULL!	2	#NULL!	4	1	1	1	1	1	1	1	1
607	24	1	4	3	1	2	#NULL!	1	1	4	3	4	2	3	3	1	1	2.42857
616	24	1	4	2	5	2	#NULL!	2	#NULL!	3	1	1	1	1	1	1	1	1
619	24	1	3	1	2	2	#NULL!	1	1	4	2	3	3	3	3	3	3	2.85714
629	24	1	3	1	3	2	#NULL!	1	2	1	2	3	2	2	2	3	2	2.28571
647	24	1	4	1	3	2	#NULL!	2	#NULL!	1	1	1	1	1	1	1	1	1
665	24	1	3	1	3	2	#NULL!	2	#NULL!	4	1	1	1	1	1	1	1	1
675	24	1	3	3	2	2	#NULL!	1	2	2	4	4	2	3	4	2	4	3.28571
717	24	1	3	3	2	2	#NULL!	2	#NULL!	4	1	1	1	1	1	1	1	1
719	24	1	3	1	3	2	#NULL!	2	#NULL!	4	4	4	2	2	4	2	3	3
740	24	1	4	1	2	2	#NULL!	1	1	4	3	4	2	2	4	1	1	2.42857
755	24	1	3	3	2	2	#NULL!	1	1	1	2	1	1	1	2	1	1	1.28571
803	24	1	4	3	1	2	#NULL!	2	#NULL!	1	2	3	2	5	4	2	1	2.71429
818	24	1	4	1	3	2	#NULL!	1	2	1	1	2	1	1	2	1	1	1.28571
820	24	1	4	1	3	2	#NULL!	1	2	1	4	5	2	4	5	3	3	3.71429
824	24	1	4	2	2	2	#NULL!	1	2	4	3	2	1	2	3	1	1	1.85714
845	24	1	4	2	5	2	#NULL!	1	1	4	3	2	1	2	2	1	1	1.71429
861	24	1	4	1	3	2	#NULL!	1	1	4	3	2	1	4	2	1	1	2
867	24	1	3	3	2	2	#NULL!	1	1	4	4	4	2	4	3	2	2	3
872	24	1	4	1	3	2	#NULL!	1	1	4	4	4	2	2	5	2	2	3
876	24	1	4	3	2	2	#NULL!	1	1	2	3	4	2	3	3	2	2	2.71429
880	24	1	4	1	3	2	#NULL!	1	1	3	3	3	4	4	4	2	1	3
898	24	1	4	3	2	2	#NULL!	2	#NULL!	1	2	4	1	1	4	1	1	2
936	24	1	3	2	2	2	#NULL!	1	2	4	1	1	1	2	3	1	1	1.42857
971	24	1	4	3	2	2	#NULL!	1	1	1	2	2	1	2	2	2	1	1.71429
985	24	1	3	2	5	2	#NULL!	1	1	1	3	2	1	1	3	1	1	1.71429
987	24	1	3	2	4	2	#NULL!	2	#NULL!	2	3	4	3	4	5	3	3	3.57143
995	24	1	4	1	4	2	#NULL!	1	2	1	1	1	1	1	1	1	1	1
110	24	2	4	3	2	1	1	1	1	3	5	5	5	5	4	5	5	4.85714
470	24	2	3	1	2	1	1	1	2	1	4	3	3	3	3	3	3	3.14286
606	24	2	4	2	1	1	2	1	2	2	1	4	1	1	1	1	1	1.42857
852	24	2	4	3	2	1	1	1	1	4	4	4	2	3	3	2	2	2.85714
982	24	2	4	1	1	1	2	1	2	4	2	4	1	3	1	1	1	1.85714
36	24	2	3	1	3	2	#NULL!	1	1	2	2	2	1	5	3	1	3	2.42857
58	24	2	3	2	2	2	#NULL!	1	1	3	4	2	1	1	4	1	1	2
66	24	2	3	1	3	2	#NULL!	1	1	1	3	2	1	2	3	1	1	1.85714
97	24	2	3	1	3	2	#NULL!	2	#NULL!	4	5	5	5	4	3	3	3	4
166	24	2	4	2	1	2	#NULL!	2	#NULL!	3	5	5	5	4	3	1	1	3.42857
214	24	2	4	3	2	2	#NULL!	1	1	1	2	1	1	2	1	1	2	1.42857
228	24	2	4	1	3	2	#NULL!	1	1	4	3	4	2	1	4	2	4	2.85714
261	24	2	4	1	4	2	#NULL!	2	#NULL!	4	2	4	3	2	2	1	2	2.28571
262	24	2	4	2	5	2	#NULL!	2	#NULL!	3	2	2	2	1	2	3	2	2
294	24	2	3	1	4	2	#NULL!	2	#NULL!	2	2	4	2	2	5	2	2	2.71429
309	24	2	4	1	2	2	#NULL!	1	2	1	3	4	1	1	4	2	1	2.28571
326	24	2	4	3	2	2	#NULL!	2	#NULL!	4	2	2	1	3	3	1	1	1.85714
423	24	2	3	1	4	2	#NULL!	2	#NULL!	1	1	1	1	1	1	1	1	1
428	24	2	4	2	5	2	#NULL!	1	1	4	2	2	2	2	4	2	1	2.14286
457	24	2	3	3	2	2	#NULL!	2	#NULL!	4	1	1	1	1	1	1	1	1
602	24	2	4	3	2	2	#NULL!	1	1	1	1	1	1	1	1	1	1	1
648	24	2	3	1	1	2	#NULL!	2	#NULL!	3	2	2	1	1	1	1	1	1.28571
727	24	2	4	2	1	2	#NULL!	1	2	1	2	2	2	2	5	1	1	2.14286
779	24	2	3	1	2	2	#NULL!	2	#NULL!	4	1	1	1	1	1	1	1	1
809	24	2	3	3	2	2	#NULL!	1	1	1	1	3	1	1	4	1	1	1.71429
811	24	2	4	1	2	2	#NULL!	2	#NULL!	4	2	2	1	2	2	2	1	1.71429
821	24	2	4	2	3	2	#NULL!	1	2	3	1	1	1	1	1	1	1	1
900	24	2	4	1	3	2	#NULL!	2	#NULL!	3	4	3	2	3	1	1	1	2.14286
907	24	2	4	1	3	2	#NULL!	2	#NULL!	3	3	3	1	2	2	1	1	1.85714
933	24	2	4	1	3	2	#NULL!	1	1	4	3	5	2	3	5	1	4	3.28571
954	24	2	3	3	2	2	#NULL!	1	1	1	4	4	1	2	5	1	1	2.57143
973	24	2	4	3	1	2	#NULL!	2	#NULL!	3	2	2	2	2	4	2	2	2.28571
